# Supplementary material
Source: publisher figshare collection journal article supplement (https://acs.figshare.com/ndownloader/files/13372883)
Supplement: Supplementary file 1 [file 13372883]

## Sheet: Myoglobin digest
Checked	Confidence	Sequence	Modifications	# Protein Groups	# Proteins	# PSMs	Master Protein Accessions	# Missed Cleavages	Theo. MH+ [Da]	XCorr Sequest HT	Confidence Sequest HT	Percolator q-Value Sequest HT	Percolator PEP Sequest HT
FALSE	High	YLEFISDAIIHVLHSK		1	1	34	P68082	0	1885.02	3.94095	High	0	5.12e-06
FALSE	High	VEADIAGHGQEVLIR		1	1	46	P68082	0	1606.85	3.87804	High	0	7.512e-06
FALSE	High	HGTVVLTALGGILK		1	1	47	P68082	0	1378.84	3.60653	High	0	3.621e-05
FALSE	High	HPGDFGADAQGAMTK	1xOxidation [M13]	1	1	26	P68082	0	1518.66	3.58432	High	0	0.01618
FALSE	High	HPGDFGADAQGAMTK		1	1	18	P68082	0	1502.67	3.56859	High	0	9.23e-05
FALSE	High	HGTVVLTALGGILKK		1	1	5	P68082	1	1506.94	3.49277	High	0	2.11457e-06
FALSE	High	KHGTVVLTALGGILK		1	1	9	P68082	1	1506.94	2.80428	High	0	0.001622
FALSE	High	NDIAAKYKELGFQG		1	1	2	P68082	2	1553.8	2.72656	High	0	0.005
FALSE	High	YKELGFQG		1	1	25	P68082	1	941.473	2.63072	High	0	0.006256
FALSE	High	ALELFRNDIAAK		1	1	5	P68082	1	1360.76	2.47886	High	0	0.0004224
FALSE	High	LFTGHPETLEK		1	1	39	P68082	0	1271.66	2.41327	High	0	0.01031
FALSE	High	MGLSDGEWQQVLNVWGK		1	1	7	P68082	0	1946.94	2.36416	High	0.005109	0.1094
FALSE	High	ASEDLKKHGTVVLTALGGILK		1	1	10	P68082	2	2150.25	2.24616	High	0.0074	0.1853
FALSE	High	ALELFRNDIAAKYK		1	1	1	P68082	2	1651.92	2.21217	High	0	0.01152
FALSE	High	ELGFQG		1	1	11	P68082	0	650.314	1.91393	High	0	0.01061
FALSE	High	ALELFR		1	1	36	P68082	0	748.435	1.70598	High	0	0.0001628
FALSE	High	HLKTEAEMK	1xOxidation [M8]	1	1	1	P68082	1	1102.56	1.33449	High	0	0.03105
FALSE	High	HKIPIK		1	1	2	P68082	1	735.488	1.29936	High	0	0.02785
FALSE	High	LFTGHPETLEKFDK		1	1	1	P68082	1	1661.85	1.25788	High	0.002805	0.08359
FALSE	High	ASEDLKK		1	1	1	P68082	1	790.431	0.787697	High	0.0074	0.2165
FALSE	High	TEAEMK		1	1	1	P68082	0	708.323	0.315077	High	0.005109	0.1496
FALSE	Medium	VEADIAGHGQEVLIRLFTGHPETLEK		1	1	3	P68082	1	2859.5	1.45608	Medium	0.03332	0.3614
FALSE	Medium	ASEDLK		1	1	3	P68082	0	662.336	1.09111	Medium	0.02498	0.3201
FALSE	Medium	MGLSDGEWQQVLNVWGK	1xOxidation [M1]	1	1	1	P68082	0	1962.94	0.963708	Medium	0.02077	0.2663
FALSE	Medium	HPGDFGADAQGAMTKALELFRNDIAAK		1	1	1	P68082	2	2844.41	0.473375	Medium	0.02077	0.278

## Sheet: After enrichment
Checked	Confidence	Sequence	Modifications	# Protein Groups	# Proteins	# PSMs	Master Protein Accessions	# Missed Cleavages	Theo. MH+ [Da]	XCorr Sequest HT	Confidence Sequest HT	Percolator q-Value Sequest HT	Percolator PEP Sequest HT
FALSE	High	HGTVVLTALGGILKK		1	1	7	P68082	1	1506.94	5.04464	High	0	0.1007
FALSE	High	HGTVVLTALGGILK		1	1	10	P68082	0	1378.84	4.10438	High	0	0.1307
FALSE	High	VEADIAGHGQEVLIR		1	1	2	P68082	0	1606.85	3.64494	High	0	0.0233155
FALSE	High	YLEFISDAIIHVLHSK		1	1	1	P68082	0	1885.02	2.24993	High	0	0.1196
FALSE	High	HPGDFGADAQGAMTKALELFR	1xOxidation [M13]	1	1	1	P68082	1	2248.08	0.72431	High	0	0.6258
FALSE	High	MGLSDGEWQQVLNVWGK		1	1	1	P68082	0	1946.94	0.256571	High	0	0.6415
FALSE	High	HLKTEAEMK		1	1	1	P68082	1	1086.56	0.0709355	High	0	0.6047
FALSE	High	YLEFISDAIIHVLHSKHPGDFGADAQGAMTK	1xOxidation [M29]	1	1	1	P68082	1	3384.67	0.0410539	High	0	0.6283
